# Supplementary material
Source: PubMed Central journal article supplement (PMC7365747)
Supplement: NIHMS1556343-supplement-2.pdf [file NIHMS1556343-supplement-2.pdf]

**APPENDIX****Appendix 1. Alignment Between Clinical Targets for the E-QUAL Avoidable Imaging Initiative and the ACEP Choosing Wisely™ Recommendations**

| E-QUAL Target                   | E-QUAL Metric                                                                                                                                                     | Choosing Wisely™ Recommendation <sup>1</sup>                                                                                                                                                                                                                                                                           |
|---------------------------------|-------------------------------------------------------------------------------------------------------------------------------------------------------------------|------------------------------------------------------------------------------------------------------------------------------------------------------------------------------------------------------------------------------------------------------------------------------------------------------------------------|
| <b>Atraumatic Low Back Pain</b> | <ul style="list-style-type: none"> <li>● XR Utilization for back pain</li> <li>● CT Utilization for back pain</li> <li>● MRI Utilization for back pain</li> </ul> | Avoid lumbar spine imaging in the emergency department for adults with non-traumatic back pain unless the patient has severe or progressive neurologic deficits or is suspected of having a serious underlying condition (such as vertebral infection, cauda equina syndrome, or cancer with bony metastasis). (10/14) |
| <b>Syncope</b>                  | <ul style="list-style-type: none"> <li>● Head CT Utilization for syncope</li> </ul>                                                                               | Avoid CT of the head in asymptomatic adult patients in the emergency department with syncope, insignificant trauma and a normal neurological evaluation. (10/14)                                                                                                                                                       |
| <b>Minor Head Injury</b>        | <ul style="list-style-type: none"> <li>● Head CT Utilization for minor head trauma</li> </ul>                                                                     | Avoid computed tomography (CT) scans of the head in emergency department patients with minor head injury who are at low risk based on validated decision rules. (10/13)                                                                                                                                                |
